# Supplementary material
Source: PubMed Central journal article supplement (PMC4964604)
Supplement: NIHMS793874-supplement-3.pdf [file NIHMS793874-supplement-3.pdf]

**Table S1. Correlations Among Cognitive Variables in the Confirmatory Factor Analysis Sample**

|    | Variable | 1    | 2    | 3    | 4    | 5    | 6    | 7     | 8     | 9     | 10    | 11    | 12    | 13    | 14    | 15    | 16    | 17    | 18    | 19    | 20    |      |
|----|----------|------|------|------|------|------|------|-------|-------|-------|-------|-------|-------|-------|-------|-------|-------|-------|-------|-------|-------|------|
| 1  | SWMA     | 1.00 | 0.35 | 0.52 | 0.41 | 0.58 | 0.45 | -0.04 | -0.49 | -0.57 | -0.08 | 0.52  | 0.52  | -0.45 | -0.27 | -0.15 | -0.35 | -0.51 | -0.52 | -0.61 | -0.57 |      |
| 2  | DSF      |      | 1.00 | 0.35 | 0.51 | 0.41 | 0.50 | 0.10  | -0.33 | -0.29 | -0.10 | 0.35  | 0.31  | -0.33 | -0.23 | -0.07 | -0.16 | -0.28 | -0.32 | -0.29 | -0.28 |      |
| 3  | SSF      |      |      | 1.00 | 0.39 | 0.60 | 0.46 | -0.05 | -0.44 | -0.36 | -0.18 | 0.35  | 0.39  | -0.42 | -0.28 | -0.11 | -0.30 | -0.37 | -0.37 | -0.30 | -0.29 |      |
| 4  | DSB      |      |      |      | 1.00 | 0.54 | 0.51 | 0.00  | -0.35 | -0.37 | -0.10 | 0.33  | 0.31  | -0.40 | -0.24 | -0.12 | -0.20 | -0.34 | -0.32 | -0.29 | -0.29 |      |
| 5  | SSB      |      |      |      |      | 1.00 | 0.53 | 0.07  | -0.45 | -0.37 | -0.17 | 0.38  | 0.45  | -0.46 | -0.30 | -0.11 | -0.23 | -0.42 | -0.43 | -0.36 | -0.43 |      |
| 6  | LNS      |      |      |      |      |      | 1.00 | 0.05  | -0.44 | -0.39 | -0.13 | 0.36  | 0.45  | -0.48 | -0.35 | -0.02 | -0.22 | -0.38 | -0.40 | -0.34 | -0.33 |      |
| 7  | SSRT     |      |      |      |      |      |      | 1.00  | 0.23  | 0.11  | 0.23  | -0.03 | 0.07  | 0.03  | 0.01  | 0.04  | 0.42  | 0.12  | 0.01  | -0.03 | -0.01 |      |
| 8  | CWI      |      |      |      |      |      |      |       | 1.00  | 0.51  | 0.37  | -0.47 | -0.32 | 0.48  | 0.29  | 0.19  | 0.36  | 0.67  | 0.51  | 0.44  | 0.42  |      |
| 9  | CWIS     |      |      |      |      |      |      |       |       | 1.00  | 0.23  | -0.56 | -0.46 | 0.51  | 0.24  | 0.17  | 0.29  | 0.41  | 0.55  | 0.75  | 0.55  |      |
| 10 | TMTS     |      |      |      |      |      |      |       |       |       | 1.00  | -0.19 | 0.10  | -0.28 | -0.15 | -0.19 | -0.22 | -0.25 | -0.23 | -0.04 | -0.08 |      |
| 11 | ANT      |      |      |      |      |      |      |       |       |       |       | 1.00  | -0.37 | 0.47  | 0.21  | 0.11  | 0.32  | 0.37  | 0.59  | 0.46  | 0.43  |      |
| 12 | TDTRT    |      |      |      |      |      |      |       |       |       |       |       | 1.00  | -0.42 | -0.20 | -0.03 | -0.22 | -0.62 | -0.49 | -0.44 | -0.39 |      |
| 13 | ANTRT    |      |      |      |      |      |      |       |       |       |       |       |       | 1.00  | 0.21  | 0.30  | 0.28  | 0.34  | 0.53  | 0.35  | 0.31  |      |
| 14 | GNGRT    |      |      |      |      |      |      |       |       |       |       |       |       |       | 1.00  | 0.12  | 0.18  | 0.24  | 0.20  | 0.17  | 0.20  |      |
| 15 | SWMRT    |      |      |      |      |      |      |       |       |       |       |       |       |       |       | 1.00  | 0.08  | 0.07  | 0.17  | 0.11  | 0.04  |      |
| 16 | TDTS     |      |      |      |      |      |      |       |       |       |       |       |       |       |       |       | 1.00  | 0.36  | 0.32  | 0.24  | 0.25  |      |
| 17 | ANTSD    |      |      |      |      |      |      |       |       |       |       |       |       |       |       |       |       | 1.00  | 0.44  | 0.45  | 0.44  |      |
| 18 | SSTSD    |      |      |      |      |      |      |       |       |       |       |       |       |       |       |       |       |       | 1.00  | 0.43  | 0.37  |      |
| 19 | GNGSD    |      |      |      |      |      |      |       |       |       |       |       |       |       |       |       |       |       |       | 1.00  | 0.90  |      |
| 20 | SWMSD    |      |      |      |      |      |      |       |       |       |       |       |       |       |       |       |       |       |       |       |       | 1.00 |

Note. ANT = Attention Networks Test, total errors (reversed sign); ANTRT = Attention Networks Test, mean reaction time (RT); ANTSD = Attention Networks Test, standard deviation (SD) of valid RT; CWI = Delis-Kaplan Executive Function System (D-KEFS) Color-Word Interference Test (CWIT), Inhibition raw score; CWIS = D-KEFS CWIT Inhibition/Switching raw score (controlling for Color Naming and Word Reading scores); DSB = Wechsler Intelligence Scale for Children, 4<sup>th</sup> Edition (WISC-IV) Digit Span Backward – total raw score; DSF = WISC-IV Digit Span Forward – total raw score; GNGRT = Go-NoGo Test, mean RT

for valid hits; GNGSD = Go-NoGo Test, SD of valid RT; INH = inhibition; LNS = WISC-IV Letter Number Sequencing – total raw score; RTV = reaction time variability; SSB = WISC-IV Spatial Span Backward – total raw score; SSF = WISC-IV Spatial Span Forward– total raw score; SSRT = Stop Signal Test – mean Stop Signal Reaction Time; SSTSD = Stop Signal Test, SD of “Go” RT; SWMA = Spatial Working Memory – mean accuracy; SWMRT = Spatial Working Memory, mean RT correct trials; SWMSD = spatial working memory, SD of RT correct trials; TDTRT = Time Discrimination Test, median correct RT; TDTSD = Time Discrimination Test, SD of valid RT; TMTS = D-KEFS Trail Making Test Number-Letter Switching raw score (controlling for Visual Scanning and Number Sequencing scores); WM = working memory.
