# Supplementary material
Source: PubMed Central journal article supplement (PMC4964604)

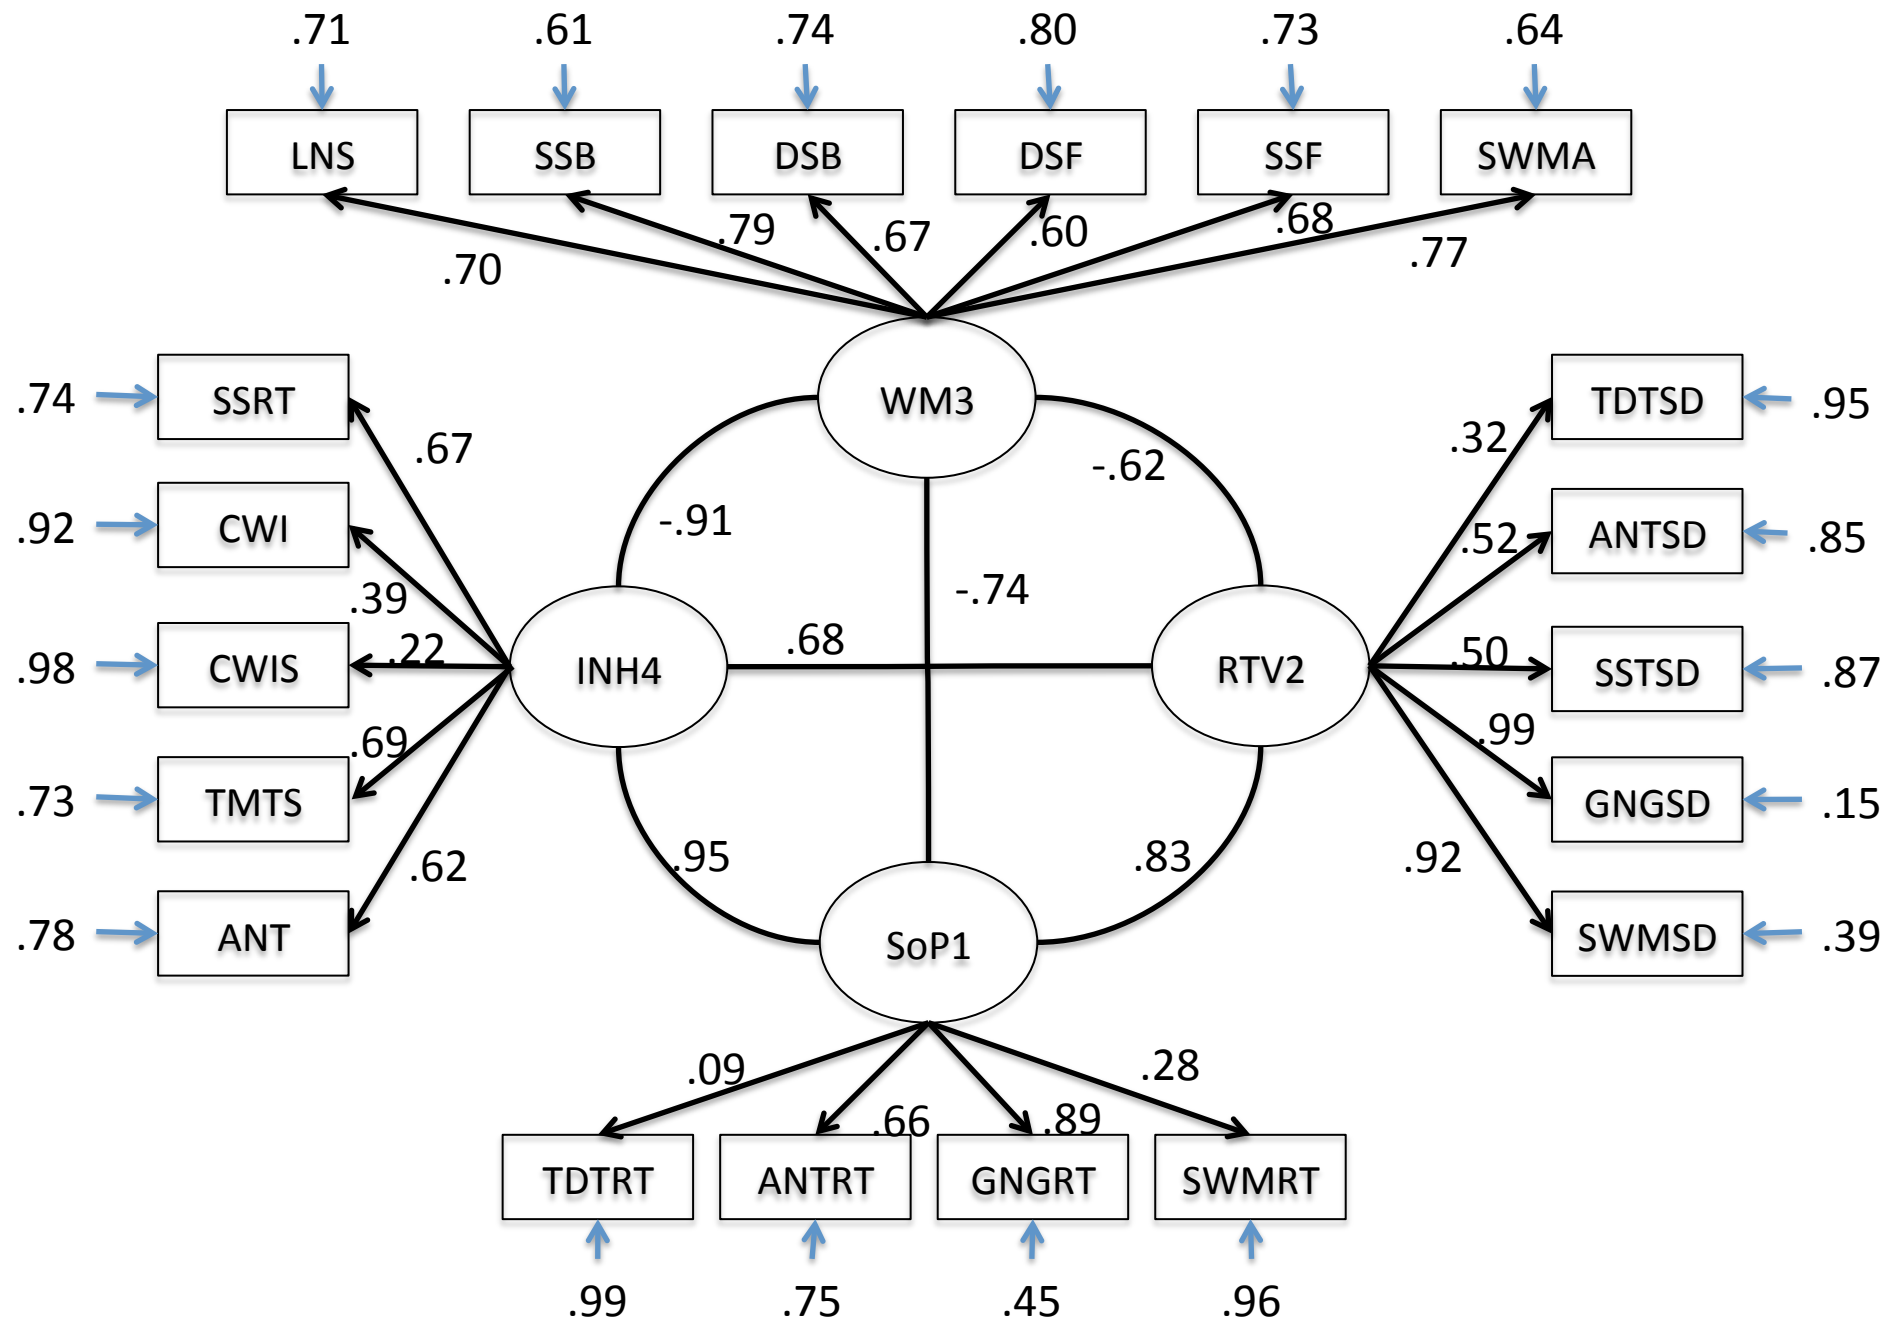

Supplement: NIHMS793874-supplement-1.pdf [file NIHMS793874-supplement-1.pdf]
